# Supplementary material for: A computational approach for designing novel SARS-CoV-2 Mpro inhibitors: combined QSAR, molecular docking, and molecular dynamics simulation techniques
Source: Royal Society of Chemistry journal article supplement (doi:10.1039/d1nj02127c), 2021-01-01
Supplement: d1nj02127c1.pdf [file d1nj02127c1.pdf]

**The computational approach of designing novel SARS-CoV-2 M<sup>pro</sup> inhibitors: combined QSAR, molecular docking, and molecular dynamics simulation techniques**

**Jian-Bo Tong<sup>\*1,2</sup>, Ding Luo<sup>1,2</sup>, Hai-Yin Xu<sup>1,2</sup>, Shuai Bian<sup>1,2</sup>, Xing Zhang, Xue-Chun Xiao<sup>1,2</sup>, Jie Wang<sup>1,2</sup>**

<sup>1</sup> College of Chemistry and Chemical Engineering, Shaanxi University of Science and Technology, Xi'an 710021, China

<sup>2</sup> Shaanxi Key Laboratory of Chemical Additives for Industry, Xi'an 710021, China

**\*Corresponding author:** Jian-Bo Tong<sup>\*1,2</sup>; E-mail: jianbotong@aliyun.com;

Table S1: Compound structure and their experimental  $IC_{50}$  and  $pIC_{50}$  values

Table S2: Experimental and predicted  $pIC_{50}$  with residual of training and test sets based on HQSAR 3-4 and Topomer CoMFA model 2.

Table S3: Table S3: Y-randomization test of optimal models.

Table S4: Newly designed compounds and predicted activity

Fig. S1: 2D view of binding conformations and ligand interactions of newly designed compounds at the active site of SARS-CoV-2 M<sup>pro</sup>

Table S1. Compound structure and their experimental  $IC_{50}$  and  $pIC_{50}$  values

| Comp. | structure                                                                           | $IC_{50}$<br>( $\mu M$ ) | $pIC_{50}$ |
|-------|-------------------------------------------------------------------------------------|--------------------------|------------|
| 1     | 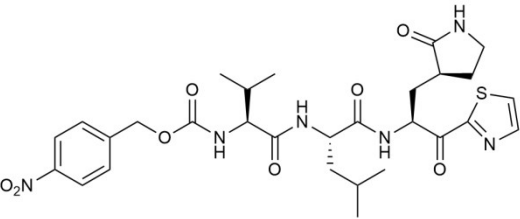 | 36                       | 4.444      |
| 2     |  | 85                       | 4.071      |

|   |                                                                                      |     |       |
|---|--------------------------------------------------------------------------------------|-----|-------|
| 3 | 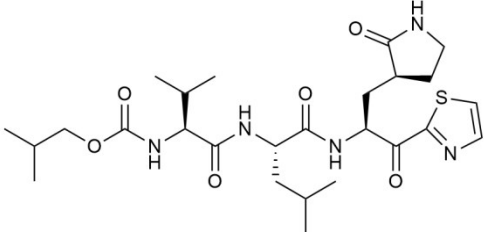    | 250 | 3.602 |
| 4 |     | 280 | 3.553 |
| 5 |     | 13  | 4.886 |
| 6 |    | 24  | 4.620 |
| 7 |   | 6.8 | 5.167 |
| 8 |   | 2   | 5.699 |
| 9 |  | 1.7 | 5.770 |

|    |                                                                                      |      |       |
|----|--------------------------------------------------------------------------------------|------|-------|
| 10 | 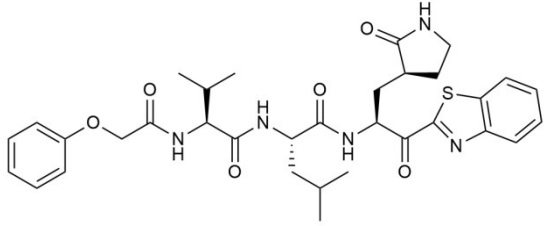   | 2.3  | 5.638 |
| 11 |    | 0.92 | 6.036 |
| 12 |    | 1.9  | 5.721 |
| 13 |   | 0.75 | 6.125 |
| 14 |  | 1.2  | 5.921 |
| 15 |  | 0.65 | 6.187 |
| 16 |  | 1.7  | 5.770 |
| 17 |  | 3.4  | 5.469 |

|    |                                                                                      |      |       |
|----|--------------------------------------------------------------------------------------|------|-------|
| 18 | 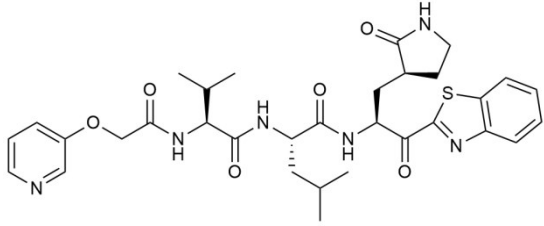   | 2.9  | 5.538 |
| 19 |    | 1.5  | 5.824 |
| 20 |    | 7.5  | 5.125 |
| 21 |    | 9.5  | 5.022 |
| 22 |  | 1600 | 2.796 |
| 23 |  | 1600 | 2.796 |
| 24 |   | 260  | 3.585 |

|    |                                                                                     |      |       |
|----|-------------------------------------------------------------------------------------|------|-------|
| 25 | 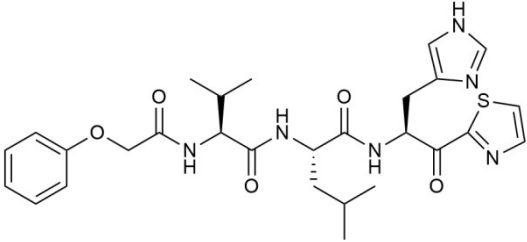   | 210  | 3.678 |
| 26 |    | 1600 | 2.796 |
| 27 |    | 9.5  | 5.022 |
| 28 |   | 21.0 | 4.678 |
| 29 |  | 43.0 | 4.367 |
| 30 |  | 24.0 | 4.620 |
| 31 |  | 10.0 | 5.000 |

|    |                                                                                      |       |       |
|----|--------------------------------------------------------------------------------------|-------|-------|
| 32 | 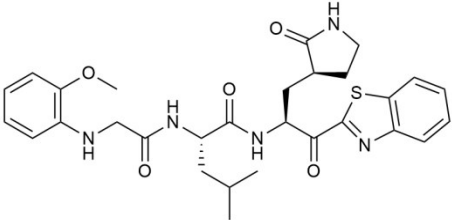    | 14.0  | 4.854 |
| 33 |     | 1.95  | 5.710 |
| 34 |     | 0.33  | 6.481 |
| 35 |    | 8.50  | 5.071 |
| 36 |   | 10.68 | 4.971 |
| 37 |  | 6.27  | 5.203 |
| 38 |   | 0.71  | 6.149 |

|    |                                                                                     |      |       |
|----|-------------------------------------------------------------------------------------|------|-------|
| 39 | 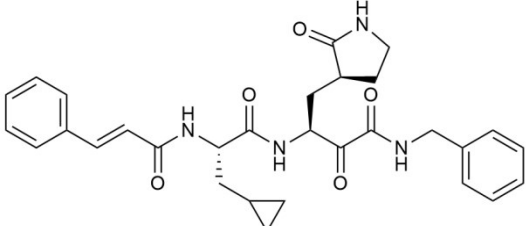   | 0.24 | 6.620 |
| 40 |    | 1.44 | 5.842 |
| 41 |    | 1.27 | 5.896 |
| 42 |   | 1.50 | 5.824 |
| 43 |  | 4.60 | 5.337 |
| 44 |  | 4.80 | 5.319 |
| 45 |  | 0.74 | 6.131 |

|    |                                                                                   |      |       |
|----|-----------------------------------------------------------------------------------|------|-------|
| 46 | 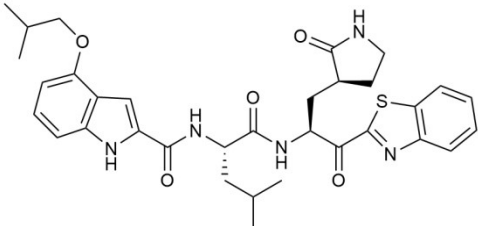 | 5.20 | 5.284 |
| 47 |  | 1.50 | 5.824 |
| 48 |  | 1.30 | 5.886 |

Table S2: Experimental and predicted pIC<sub>50</sub> with residual of training and test sets based on HQSAR 3-4 and Topomer CoMFA model 2.

| No. | Topomer CoMFA model 2    |                             |          |                       | HQSAR model 3-6 |                             |          |
|-----|--------------------------|-----------------------------|----------|-----------------------|-----------------|-----------------------------|----------|
|     | Actual pIC <sub>50</sub> | Predicted pIC <sub>50</sub> | Residual | Fragment contribution |                 | Predicted pIC <sub>50</sub> | Residual |
|     |                          |                             |          | R <sub>a</sub>        | R <sub>b</sub>  |                             |          |
| 1   | 4.444                    | 4.371                       | 0.073    | 1.32                  | -0.39           | 4.362                       | 0.082    |
| 2*  | 4.071                    | 3.631                       | 0.442    | 0.57                  | -0.39           | 3.947                       | 0.124    |
| 3   | 3.602                    | 3.510                       | 0.092    | 0.70                  | -0.63           | 3.932                       | -0.33    |
| 4   | 3.553                    | 3.731                       | -0.178   | -0.73                 | -0.39           | 3.607                       | -0.054   |
| 5   | 4.886                    | 4.395                       | 0.491    | 1.34                  | -0.39           | 4.621                       | 0.265    |
| 6*  | 4.620                    | 3.733                       | 0.887    | 0.68                  | -0.39           | 3.744                       | 0.876    |
| 7   | 5.167                    | 4.921                       | 0.246    | 1.87                  | -0.39           | 4.853                       | 0.314    |
| 8   | 5.699                    | 5.754                       | -0.055   | 1.34                  | 0.97            | 5.954                       | -0.255   |
| 9   | 5.770                    | 5.385                       | 0.385    | 1.34                  | 0.60            | 5.405                       | 0.365    |
| 10* | 5.638                    | 5.910                       | -0.272   | 1.87                  | 0.60            | 5.638                       | 0.000    |
| 11  | 6.036                    | 5.935                       | 0.101    | 1.89                  | 0.60            | 6.049                       | -0.013   |
| 12  | 5.721                    | 5.883                       | -0.162   | 1.84                  | 0.60            | 5.823                       | -0.102   |
| 13* | 6.125                    | 5.944                       | 0.181    | 1.89                  | 0.60            | 5.862                       | 0.263    |
| 14  | 5.921                    | 5.935                       | -0.014   | 1.89                  | 0.60            | 5.872                       | 0.049    |
| 15  | 6.187                    | 5.939                       | 0.248    | 1.90                  | 0.60            | 6.297                       | -0.11    |
| 16* | 5.770                    | 5.886                       | -0.116   | 1.84                  | 0.60            | 5.766                       | 0.004    |
| 17  | 5.469                    | 5.883                       | -0.414   | 1.84                  | 0.60            | 5.363                       | 0.106    |
| 18  | 5.538                    | 5.667                       | -0.129   | 1.62                  | 0.60            | 5.554                       | -0.016   |
| 19* | 5.824                    | 5.660                       | 0.164    | 1.62                  | 0.60            | 5.595                       | 0.229    |
| 20  | 5.125                    | 4.969                       | 0.156    | 0.93                  | 0.60            | 5.131                       | -0.006   |



|     |       |       |        |       |       |       |        |
|-----|-------|-------|--------|-------|-------|-------|--------|
| 21  | 5.022 | 5.387 | -0.365 | 1.34  | 0.60  | 5.405 | -0.383 |
| 22* | 2.796 | 2.789 | 0.007  | 1.34  | -0.39 | 3.621 | -0.825 |
| 23  | 2.796 | 3.395 | -0.599 | -0.26 | -0.39 | 2.803 | -0.007 |
| 24  | 3.585 | 3.824 | -0.239 | 0.77  | -0.39 | 3.562 | 0.023  |
| 25* | 3.678 | 4.347 | -0.669 | 1.28  | -0.39 | 3.759 | -0.081 |
| 26  | 2.796 | 3.026 | -0.231 | -0.04 | -0.39 | 2.853 | -0.058 |
| 27* | 5.022 | 3.824 | 1.198  | 0.77  | -0.39 | 4.526 | 0.496  |
| 28  | 4.678 | 5.041 | -0.363 | 1.00  | 0.60  | 4.487 | 0.191  |
| 29  | 4.367 | 4.374 | -0.007 | 0.33  | 0.60  | 4.314 | 0.053  |
| 30  | 4.620 | 4.622 | -0.002 | 0.58  | 0.60  | 4.714 | -0.094 |
| 31* | 5.000 | 4.634 | 0.366  | 0.59  | 0.60  | 4.806 | 0.194  |
| 32  | 4.854 | 4.639 | 0.215  | 0.60  | 0.60  | 4.900 | -0.046 |
| 33  | 5.710 | 5.721 | -0.011 | 0.94  | 1.33  | 5.761 | -0.051 |
| 34* | 6.481 | 5.858 | 0.623  | 1.08  | 1.33  | 5.743 | 0.738  |
| 35  | 5.071 | 5.366 | -0.295 | 0.60  | 1.33  | 5.361 | -0.29  |
| 36  | 4.971 | 4.705 | 0.266  | -0.08 | 1.33  | 5.001 | -0.03  |
| 37  | 5.203 | 5.301 | -0.098 | 0.52  | 1.33  | 5.795 | -0.592 |
| 38  | 6.149 | 6.176 | -0.027 | 1.39  | 1.33  | 6.015 | 0.134  |
| 39  | 6.620 | 6.058 | 0.562  | 1.28  | 1.33  | 6.082 | 0.538  |
| 40  | 5.842 | 6.141 | -0.299 | 1.37  | 1.33  | 5.964 | -0.122 |
| 41* | 5.896 | 6.265 | -0.269 | 1.38  | 1.33  | 6.074 | -0.178 |
| 42  | 5.824 | 5.686 | 0.138  | 1.63  | 0.60  | 5.772 | 0.052  |
| 43  | 5.337 | 5.511 | -0.174 | 1.46  | 0.60  | 5.750 | -0.413 |
| 44  | 5.319 | 5.390 | -0.071 | 1.34  | 0.60  | 5.313 | 0.006  |
| 45  | 6.131 | 5.987 | 0.144  | 1.94  | 0.60  | 6.140 | -0.009 |
| 46* | 5.284 | 5.750 | -0.506 | 1.75  | 0.60  | 6.050 | -0.766 |
| 47  | 5.824 | 5.928 | -0.104 | 1.88  | 0.60  | 5.910 | -0.086 |
| 48  | 5.886 | 5.674 | 0.212  | 1.63  | 0.60  | 5.864 | 0.022  |

[a]: Randomly selected as the test set

Table S3: Y-randomization test of optimal models.

| Y-random Iteration | Topomer CoMFA 2 |        | HQSAR3-6 |        |
|--------------------|-----------------|--------|----------|--------|
|                    | $r^2$           | $q^2$  | $r^2$    | $q^2$  |
| 1                  | 0.157           | -0.847 | 0.017    | -0.352 |
| 2                  | 0.174           | -0.367 | 0.205    | -0.072 |
| 3                  | 0.307           | -0.544 | 0.140    | -0.158 |
| 4                  | 0.158           | -0.423 | 0.078    | -0.411 |
| 5                  | 0.324           | -0.378 | 0.069    | -0.476 |
| 6                  | 0.200           | -0.745 | 0.099    | -0.218 |
| 7                  | 0.278           | -0.207 | 0.055    | -0.310 |
| 8                  | 0.453           | -0.744 | 0.090    | -0.191 |
| 9                  | 0.237           | -0.336 | 0.128    | -0.204 |
| 10                 | 0.222           | -0.455 | 0.194    | -0.048 |
| 11                 | 0.426           | -0.115 | 0.052    | -0.328 |

|            |       |        |       |        |
|------------|-------|--------|-------|--------|
| 12         | 0.201 | -0.578 | 0.288 | -0.046 |
| 13         | 0.262 | -0.639 | 0.085 | -0.256 |
| 14         | 0.351 | -0.154 | 0.025 | -0.469 |
| 15         | 0.320 | -0.306 | 0.102 | -0.259 |
| 16         | 0.134 | -0.521 | 0.206 | 0.009  |
| 17         | 0.417 | 0.0626 | 0.177 | -0.095 |
| 18         | 0.342 | -0.288 | 0.246 | -0.175 |
| 19         | 0.231 | -0.447 | 0.209 | -0.264 |
| 20         | 0.217 | -0.690 | 0.127 | -0.176 |
| Non-Random | 0.936 | 0.738  | 0.955 | 0.774  |

Table S4: Newly designed compounds and predicted activity

| Comp.               | structure | $pIC_{50}(\text{Pred})_a$ | $pIC_{50}(\text{Pred})_b$ |
|---------------------|-----------|---------------------------|---------------------------|
| 15R <sub>a</sub> +1 |           | 7.07                      | 7.997                     |
| 15R <sub>a</sub> +2 |           | 6.91                      | 7.926                     |
| 15R <sub>a</sub> +3 |           | 6.97                      | 5.872                     |
| 15R <sub>a</sub> +4 |           | 6.94                      | 7.093                     |

|                     |  |      |       |
|---------------------|--|------|-------|
| 15R <sub>a</sub> +5 |  | 6.95 | 7.836 |
| 15R <sub>a</sub> +6 |  | 6.97 | 6.958 |
| 21R <sub>a</sub> +1 |  | 6.52 | 7.249 |
| 21R <sub>a</sub> +2 |  | 6.35 | 7.177 |
| 21R <sub>a</sub> +3 |  | 6.42 | 5.124 |
| 21R <sub>a</sub> +4 |  | 6.38 | 6.344 |

|                     |                                                                                      |      |       |
|---------------------|--------------------------------------------------------------------------------------|------|-------|
| 21R <sub>a</sub> +5 | 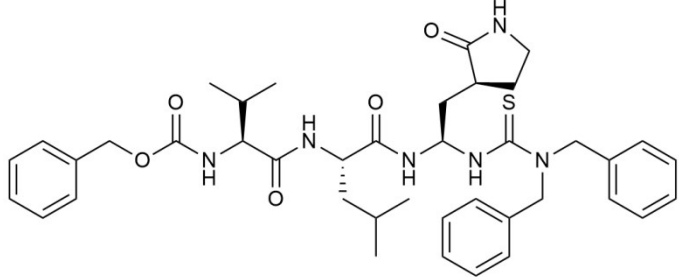   | 6.39 | 7.087 |
| 21R <sub>a</sub> +6 |    | 6.41 | 6.209 |
| 38R <sub>a</sub> +1 |    | 6.57 | 7.213 |
| 38R <sub>a</sub> +2 |  | 6.41 | 7.141 |
| 38R <sub>a</sub> +3 |   | 6.47 | 5.088 |
| 38R <sub>a</sub> +4 |   | 6.44 | 6.308 |

|                     |                                                                                      |      |       |
|---------------------|--------------------------------------------------------------------------------------|------|-------|
| 38R <sub>a</sub> +5 | 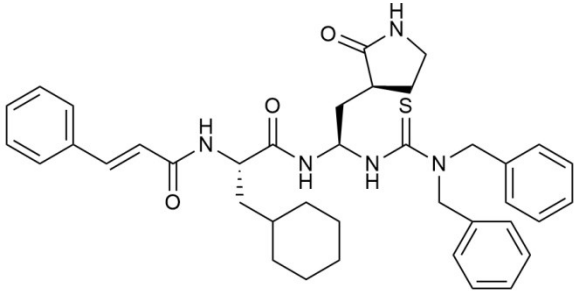    | 6.45 | 7.051 |
| 38R <sub>a</sub> +6 |    | 6.47 | 6.173 |
| 45R <sub>a</sub> +1 |    | 7.12 | 7.857 |
| 45R <sub>a</sub> +2 |  | 6.95 | 7.785 |
| 45R <sub>a</sub> +3 |   | 7.02 | 5.731 |
| 45R <sub>a</sub> +4 |   | 6.99 | 7.695 |

|                     |                                                                                    |      |       |
|---------------------|------------------------------------------------------------------------------------|------|-------|
| 45R <sub>a</sub> +5 | 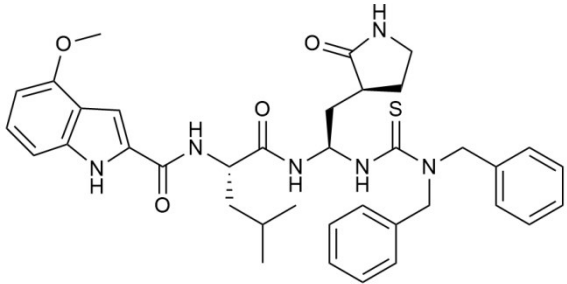  | 6.99 | 7.695 |
| 45R <sub>a</sub> +6 |  | 7.01 | 6.817 |

[a]: predicted by Topomer CoMFA model 2; [b]: predicted by HQSAR model 3-4;

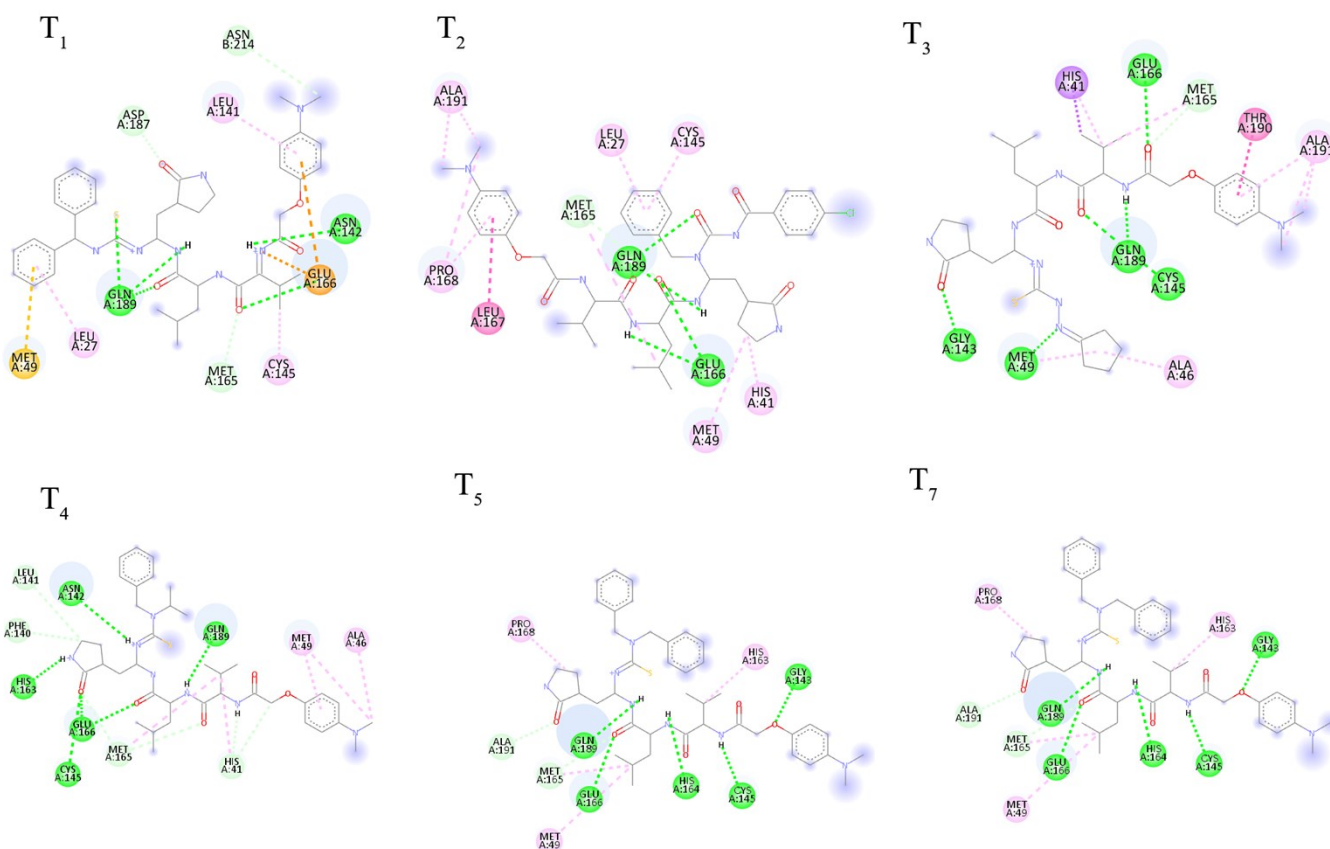

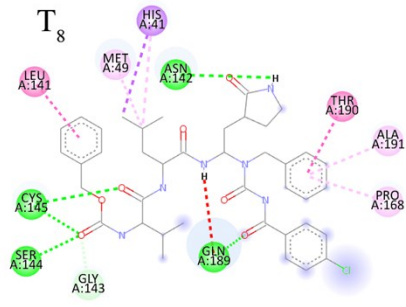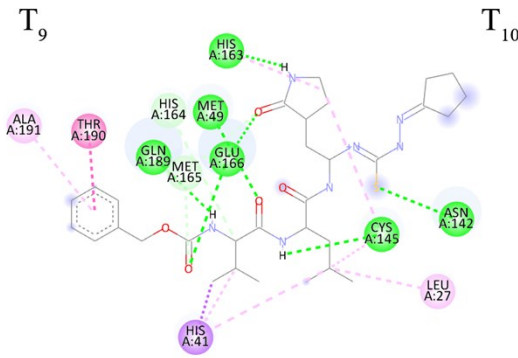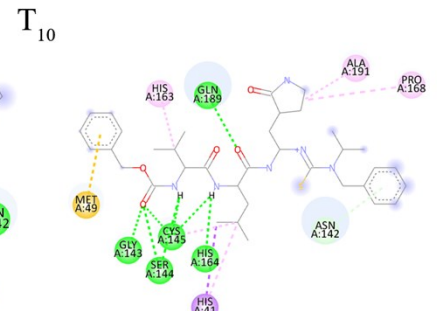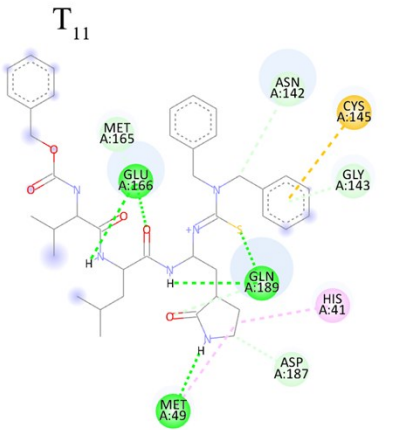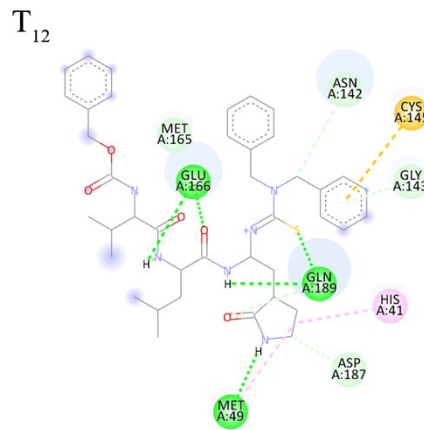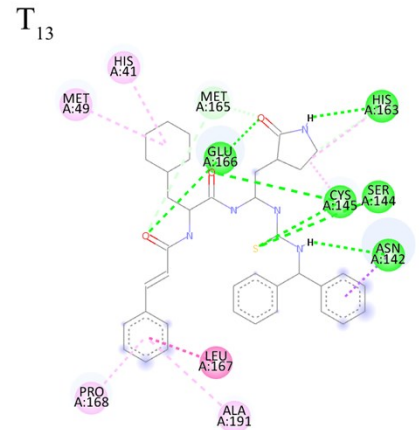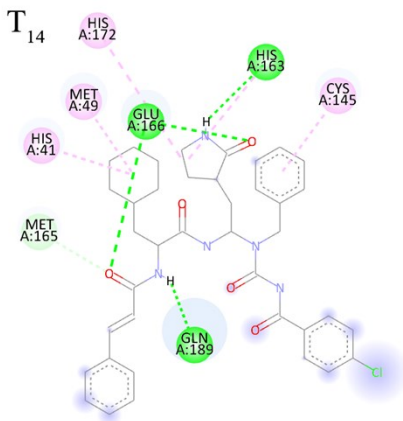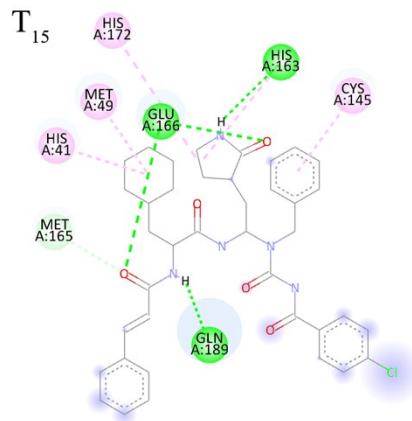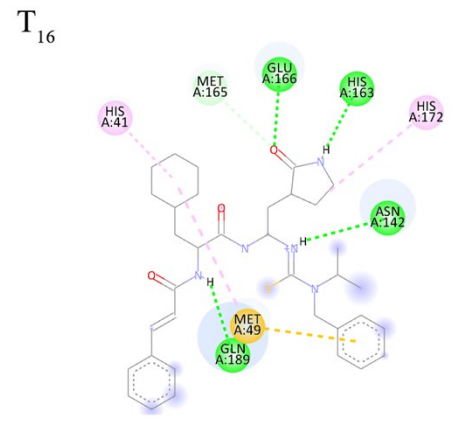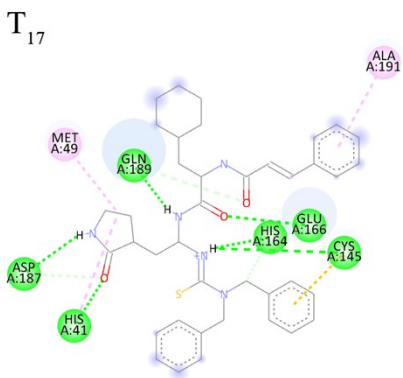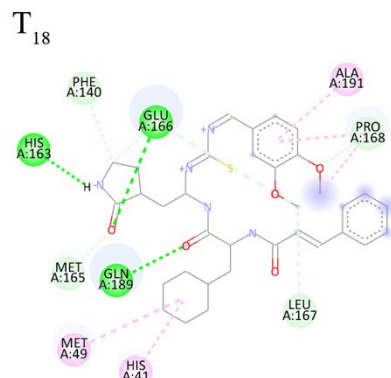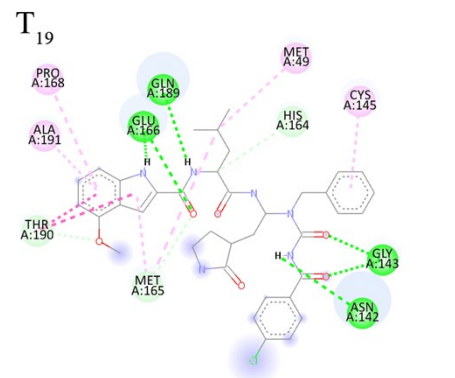

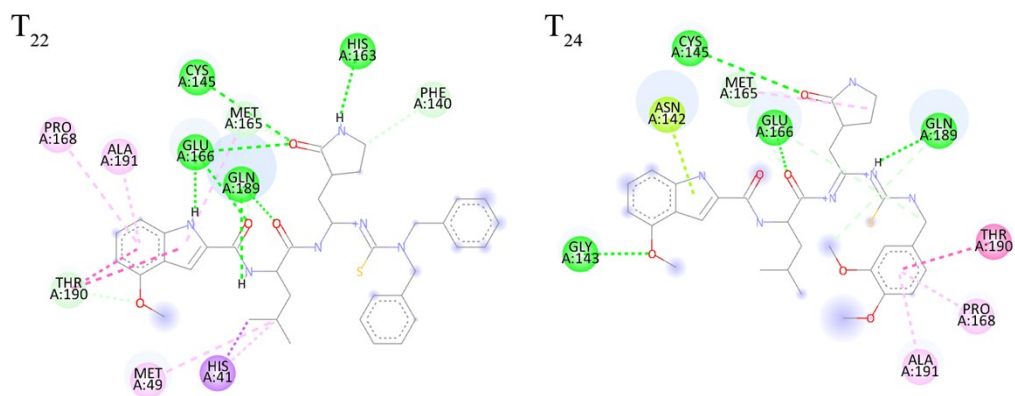

Fig S1: 2D view of binding conformations and ligand interactions of newly designed compounds at the active site of SARS-CoV-2 M<sup>pro</sup>.
